# Supplementary material
Source: PubMed Central journal article supplement (PMC2761083)
Supplement: NIHMS132268-supplement-1_si_001.pdf [file NIHMS132268-supplement-1_si_001.pdf]

## SUPPORTING INFORMATION

### **Formation of a unique end-to-end stacked pair of G-quadruplexes in the hTERT core promoter with implications for inhibition of telomerase by G-quadruplex-interactive ligands**

SunMi L. Palumbo,<sup>1</sup> Scot W. Ebbinghaus,<sup>2</sup> Laurence H. Hurley<sup>1,3,4\*</sup>

<sup>1</sup>Arizona Cancer Center, University of Arizona, 1515 N. Campbell Avenue, Tucson, Arizona 85724

<sup>2</sup>Merck Research Labs, UG4D-72, PO BOX 1000, North Wales, PA 19454 (present address)

<sup>3</sup>College of Pharmacy, University of Arizona, Tucson, Arizona 85721

<sup>4</sup>BIO5 Institute, University of Arizona, 1657 E. Helen Street, Tucson, Arizona 85721

\*Address correspondence to Laurence H. Hurley, University of Arizona, BIO5 Institute, 1657 E. Helen Street, Tucson, Arizona 85721; Telephone: 520 626-5622; Fax: 520 626-4824; E-mail: hurley@pharmacy.arizona.edu

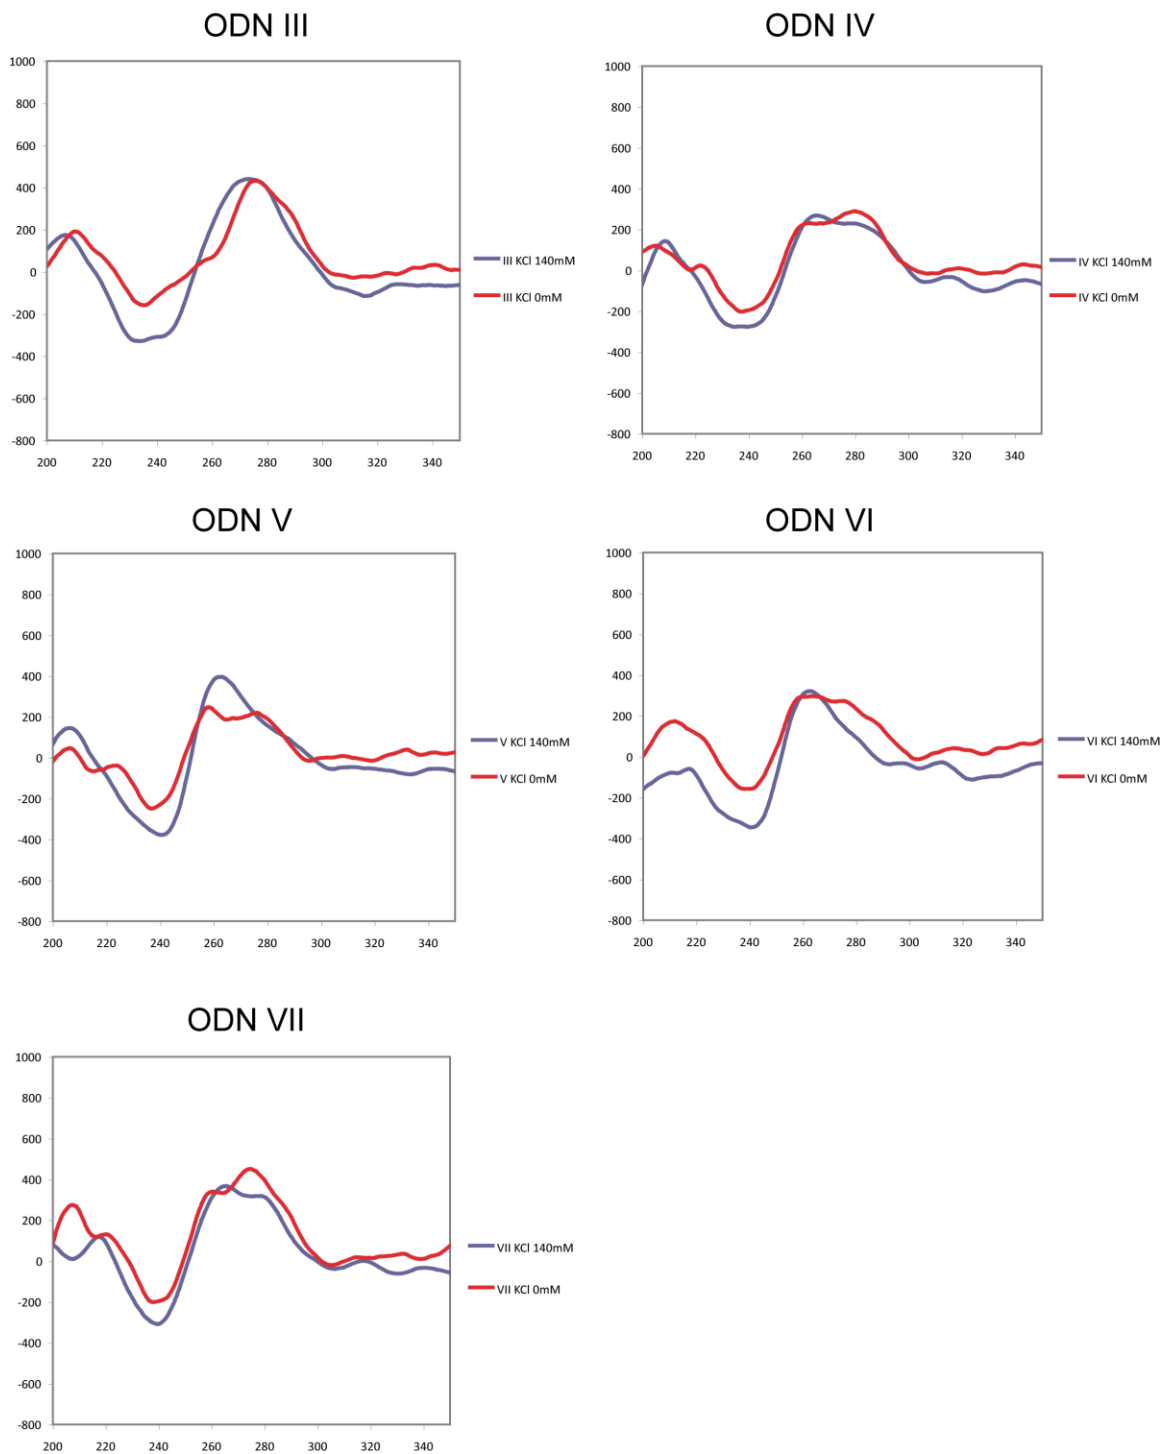

Figure S1. CD spectra of ODNs not shown in Figure 2.

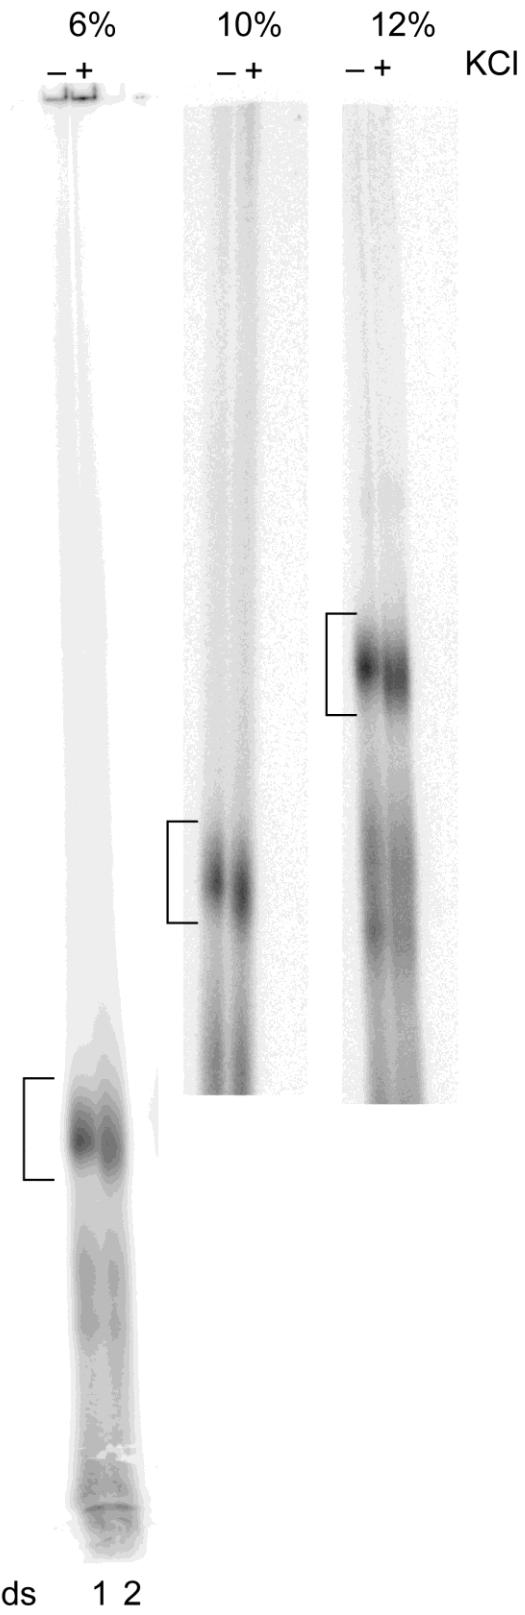

Figure S2: Original gels for Figure 4C. Brackets indicate regions shown in Figure 4C.
